1 A transgenic zebrafish line for *in vivo*  
2 visualisation of neutrophil  
3 myeloperoxidase  
4

5 A transgenic zebrafish line expressing fluorescently-tagged  
6 human myeloperoxidase in neutrophils presents a useful  
7 tool for investigating neutrophil granule dynamics *in vivo*,  
8 without disrupting neutrophil migration to inflammatory  
9 stimuli.  
10

11 Kyle D. Buchan<sup>1</sup>, Nienke W.M. de Jong<sup>2</sup>, Michiel van Gent<sup>2</sup>, Julia Kolata<sup>2</sup>, Simon J.  
12 Foster<sup>3</sup>, Jos A.G. van Strijp<sup>2</sup>, Stephen A. Renshaw<sup>1</sup>

13 1. The Bateson Centre and Department of Infection, Immunity and Cardiovascular Disease, University  
14 of Sheffield, Western Bank, Sheffield, S10 2TN, UK.

15 2. Department of Medical Microbiology, University Medical Center Utrecht, Utrecht University, Utrecht,  
16 The Netherlands.

17 3. Department of Molecular Biology and Biotechnology, University of Sheffield, Western Bank,  
18 Sheffield, S10 2TN, UK.

## 19 Abstract

20

21 The neutrophil enzyme myeloperoxidase (MPO) is a major enzyme utilised by  
22 neutrophils to generate reactive oxygen species (ROS), amplifying their capacity for  
23 destroying pathogens and regulating inflammation. Despite its roles in the innate  
24 immunity, the importance of MPO in preventing infection is unclear, as individuals  
25 with MPO deficiency are asymptomatic with the exception of an increased risk of  
26 candidiasis. Dysregulation of MPO activity is also linked with inflammatory conditions  
27 such as atherosclerosis, emphasising a need to understand the roles of the enzyme  
28 in greater detail. Consequently, new tools for investigating granular dynamics *in vivo*  
29 can provide useful insights into how MPO localises within neutrophils, aiding  
30 understanding of its role in preventing and exacerbating disease. The zebrafish is a  
31 powerful model for investigating the immune system *in vivo*, as it is genetically  
32 tractable, and optically transparent.

33 To visualise MPO activity within zebrafish neutrophils, we created a genetic  
34 construct that expresses human MPO as a fusion protein with a C-terminal  
35 fluorescent tag, driven by the neutrophil-specific promoter *lyz*. After introducing the  
36 construct into the zebrafish genome by Tol2 transgenesis, we established the  
37 *Tg(lyz:MPO-mEmerald,cmlc2:eGFP)sh496* line, and confirmed transgene expression  
38 in zebrafish neutrophils. We observed localisation of MPO-mEmerald within a  
39 subcellular location resembling neutrophil granules, mirroring MPO in human  
40 neutrophils. In Spotless (*mpx<sup>NL144</sup>*) larvae - which express a non-functional zebrafish  
41 myeloperoxidase - the MPO-mEmerald transgene does not disrupt neutrophil  
42 migration to sites of infection or inflammation, suggesting that it is a suitable line for  
43 the study of neutrophil granule function. We also describe a method for genotyping

44 Spotless ( $mpx^{NL144}$ ) fish, which will be useful in future studies concerning  
45 myeloperoxidase in zebrafish.

46 We present a novel transgenic line that can be used to investigate neutrophil  
47 granule dynamics *in vivo* without disrupting neutrophil behaviour, with potential  
48 applications in studying processing and maturation of MPO during development.

## 49 Introduction

50

51 The enzyme Myeloperoxidase (MPO) enhances the microbicidal potential of  
52 neutrophils by converting hydrogen peroxide ( $H_2O_2$ ) into the highly toxic antimicrobial  
53 compound hypochlorous acid (HOCl) (1), and by forming radicals by oxidating  
54 substrates including phenols, nitrate and tyrosine residues (2). MPO is located in the  
55 primary granules of neutrophils, which deliver MPO and other bactericidal  
56 compounds to invading pathogens by fusing with phagocytic vesicles, accelerating  
57 pathogen destruction. MPO is the most abundant protein in the primary granules of  
58 human neutrophils (3), and consequently neutrophils are able to produce high levels  
59 of HOCl to deliver a highly potent antimicrobial response that is capable of killing a  
60 broad variety of major pathogens (4–6). The important pathogen *Staphylococcus*  
61 *aureus* produces a specific virulence factor against MPO, highlighting its importance  
62 in resisting staphylococcal infection (7).

63 Beyond its role in bolstering the antimicrobial defence, MPO is also an  
64 important regulator of inflammation. The arrival of neutrophils at the wound site  
65 marks the initial steps of the anti-inflammatory response, as MPO is delivered to the  
66 wound site to consume  $H_2O_2$  and reduce inflammatory signalling (8,9). There is also  
67 a link between aberrant MPO activity and inflammatory conditions: overactivity is  
68 associated with cardiovascular disease, multiple sclerosis and glomerulonephritis  
69 (10–12), while MPO deficiency has been implicated in pulmonary fibrosis and  
70 atherosclerosis (13,14), highlighting its critical role in immune homeostasis. MPO  
71 deficiency is a relatively common condition affecting 1 in every 2,000-4,000 people  
72 across Europe and North America (15), with no major health risks apart from a  
73 susceptibility to *Candida albicans* infections (16). This observation is in stark contrast

74 to people with chronic granulomatous disease (CGD), who lack a working enzyme  
75 that is essential for the initiation of the oxidative defence known as NADPH-oxidase.  
76 Those with CGD are unable to generate an adequate respiratory burst to destroy  
77 microbes. Unlike MPO deficiency, those with CGD experience frequent life-  
78 threatening infections from a wide range of pathogens (17), and consequently, the  
79 role of MPO is largely unclear when observed in the context of other oxidative  
80 enzymes and compounds. Further studies are required to understand the complex  
81 roles of MPO in the immune system.

82 The zebrafish is a powerful model for studying physiology and pathology *in*  
83 *vivo* and has been used to model many important conditions ranging from  
84 neurodegenerative disorders such as Alzheimers (18), to cancers including  
85 melanoma (19) and leukaemia (20). They are optically transparent, making them  
86 amenable to imaging studies and produce high numbers of offspring, which permits  
87 the application of high-throughput approaches. Another major advantage of the  
88 zebrafish is their genetic tractability, facilitating the introduction of large genetic  
89 constructs into the genome, often expressing fluorescent proteins driven by tissue-  
90 specific promoters (21). Several studies have utilised these features to create  
91 transgenic lines labelling macrophages (22) and neutrophils (23) to image the innate  
92 immune response during infection (24) and inflammation (25).

93 MPO can be measured using a variety of cytochemical and cytometry-based  
94 approaches (26), however there are relatively few tools that allow granular MPO to  
95 be visualised *in vivo* and in real time. Mouse models that permit imaging of  
96 neutrophil granules and MPO do exist (12,27), however murine MPO lacks several  
97 transcription factor binding domains (28), and is expressed at 1/10 the level found in

98 human neutrophils (29), raising concerns over whether a murine model can fully  
99 represent human MPO.

100 In this study, we have generated a transgenic zebrafish line expressing  
101 fluorescently-labelled human MPO in zebrafish neutrophils, as a tool towards  
102 investigating the roles of MPO during infection and inflammation. The MPO  
103 transgene (*lyz:MPO-mEmerald,cmlc2:eGFP*) was successfully expressed in  
104 zebrafish neutrophils and the resulting protein appears to be trafficked to the primary  
105 granules, recapitulating expression of MPO in human neutrophils. Additionally, we  
106 showed that the MPO-mEmerald enzyme does not disrupt neutrophil recruitment to  
107 sites of injury and infection. In the future, *Tg(lyz:MPO-mEmerald,cmlc2:eGFP)sh496*  
108 zebrafish may prove to be a useful tool for investigating MPO and imaging granular  
109 dynamics *in vivo* and in real-time.

## 110 **Methods**

111

### 112 **Zebrafish Husbandry**

113 Zebrafish (*Danio rerio*) were raised and maintained under the Animals (Scientific  
114 Procedures) Act 1986 using standard protocols (30). Adult zebrafish were hosted in  
115 UK Home Office-approved aquaria at the Bateson Centre, University of Sheffield,  
116 and kept under a 14/10 light/dark regime at 28°C.

117

### 118 **Cloning**

119 The plasmid used for introducing the transgene into the zebrafish genome  
120 (pDestTol2CG2 *lyz*:MPO-mEmerald *cm1c2*:eGFP) was created by Gateway cloning  
121 (21). Briefly, the MPO-mEmerald gene was incorporated into an expression vector  
122 by first digesting the mEmerald-MPO-N-18 plasmid (Addgene plasmid #54186, Dr.  
123 Michael Davidson's lab), and ligating the MPO-mEmerald fusion protein gene into  
124 the multiple cloning site vector pME MCS. pME MCS MPO-mEmerald then became  
125 a middle-entry vector after BP reaction with the pDONR221 plasmid. The final  
126 construct was created by an LR reaction combining a 5' vector containing the *lyz*  
127 promoter, the middle entry vector pDONR221 MPO-mEmerald, a 3' vector containing  
128 a polyadenylation site, and the destination vector pDestTol2CG2.

129

### 130 **Microinjection of *lyz*:MPO-mEmerald Construct DNA**

131 Construct DNA of the donor plasmid pDestTol2CG2 *lyz*:MPO-mEmerald  
132 *cm1c2*:eGFP was injected into zebrafish embryos at the one-cell stage with 10ng/μl  
133 of Tol2 transposase RNA, according to published protocols (30).

134

### 135 **Zebrafish Tailfin Transection**

136 *Tg(lyz:MPO-mEmerald,cmlc2:eGFP)sh496* zebrafish at 3 days post-fertilisation were  
137 anaesthetised by immersion in E3 supplemented with 4.2% Tricaine and complete  
138 transection of the tail was performed with a sterile scalpel. For imaging of larvae, a  
139 Nikon® custom-build wide-field microscope was used: Nikon® Ti-E with a CFI Plan  
140 Aplanachromat  $\lambda$  10X, N.A.0.45 objective lens, a custom built 500  $\mu$ m Piezo Z-stage  
141 (Mad City Labs, Madison, WI, USA) and using Intensilight fluorescent illumination  
142 with ET/sputtered series fluorescent filters 49002 and 49008 (Chroma, Bellow Falls,  
143 VT, USA) was used. Analysis was performed using Nikon's® NIS Elements software  
144 package.

145

### 146 **Bacterial Culture Preparation**

147 To prepare a liquid overnight culture of *S. aureus*, 5ml of BHI broth medium (Oxoid)  
148 was inoculated with a colony of *S. aureus* strain USA300, and incubated at 37°C  
149 overnight with shaking. To prepare *S. aureus* for injection, 50ml of BHI media was  
150 inoculated with 500 $\mu$ l of overnight culture, and incubated for roughly 2 hours at 37°C  
151 with shaking. The OD<sub>600</sub> of each culture was measured and 40ml of the remaining  
152 culture harvested by centrifugation at 4,500g for 15 minutes at 4°C. The pellet was  
153 then resuspended in a volume of PBS appropriate to the bacterial dose required.  
154 Once the pellets were resuspended they were then kept on ice until required.

155

### 156 **Spotless (*mpx*<sup>NL144</sup>) Fish**

157 The Spotless (*mpx*<sup>NL144</sup>) mutant line contains a C to T mutation at nucleotide 1126 of  
158 the *mpx* RefSeq mRNA sequence (NM\_212779), resulting in a premature stop  
159 codon (31). A detailed protocol of Sudan Black B staining can be found in



160 Supplementary File 1. After staining, fixed larvae were imaged using a Nikon®  
161 Extended focus SMZ1500 stereomicroscope with a Prior Z-drive and transmitted and  
162 reflected illumination. Images captured using a DS-Fi1 Nikon® colour camera. Data  
163 analysis was performed using Nikon's® NIS Elements software package.

164

### 165 **Microscopy of Neutrophil Granules**

166 Microscopy of neutrophil granules in *Tg(Iyz:MPO-mEmerald,cmlc2:eGFP)sh496*  
167 larvae was performed using a Zeiss® Axiovert LSM 880 Airyscan confocal  
168 microscope with 63x Plan Apochromat oil objective (NA 1.4). Cells were illuminated  
169 with a 488 nm argon laser and/or a 561 nm diode laser. Images were processed  
170 using the Zeiss® microscope software and analysed using Zen Black.

171

### 172 **Statistics**

173 All data were analysed (Prism 7.0, GraphPad Software, San Diego, CA, USA) using  
174 a two-way ANOVA with Bonferroni post-test to adjust for multiple comparisons.

## 175 Results

176

### 177 **Creation of a transgenic zebrafish expressing human myeloperoxidase**

178 To create a transgenic zebrafish that expresses a fluorescently-tagged human  
179 myeloperoxidase (MPO), we created a genetic construct using Gateway cloning that  
180 contains the MPO gene with a C-terminal fusion of the fluorescent protein mEmerald,  
181 driven by the neutrophil-specific promoter *lyz* (Figure 1A). After the construct was  
182 successfully assembled, it was introduced into the zebrafish genome by Tol2-  
183 mediated transgenesis. Successful expression in zebrafish neutrophils was  
184 confirmed by inducing transgenesis in the transgenic red neutrophil line *Tg(lyz:nfsB-  
185 mCherry)sh260* (Figure 1CD). Injected larvae were then screened at 3 days post  
186 fertilisation (dpf) for mEmerald expression and colocalisation with mCherry  
187 expression. Figure 1CD shows double-transgenic neutrophils expressing both  
188 mEmerald and mCherry in the primary haematopoietic tissue of the zebrafish larvae,  
189 the caudal haematopoietic tissue (CHT) (indicated in Figure 1B) (32). This  
190 observation confirms that the construct is successfully expressed and suggests that  
191 it co-localises with zebrafish neutrophils. We also noted that in double-transgenic  
192 neutrophils, there appeared to be a differential subcellular localisation between  
193 mEmerald and mCherry signal, with mCherry localised to areas with no visible  
194 mEmerald signal (Figure 1D).

195

### 196 **MPO-mEmerald is stably expressed in zebrafish neutrophils**

197 To secure adult zebrafish with stable germline integrations of the *lyz:MPO-mEmerald*  
198 transgene, larvae that transiently expressed the transgene were identified, raised  
199 and outcrossed to determine whether the transgene was inherited by their offspring.

200 An adult that produced larvae with a cell population labelled with mEmerald was  
201 identified and its progeny raised to produce fish stably expressing the MPO  
202 transgene, with the designation *Tg(lyz:MPO-mEmerald,cm1c2:eGFP)sh496*. To verify  
203 whether the *lyz:MPO-mEmerald* transgene was expressed in neutrophils of stably  
204 transgenic fish, they were crossed to the red neutrophil reporter line *Tg(lyz:nfsB-*  
205 *mCherry)sh260*, and screened for any co-expression of fluorescent proteins. Both  
206 transgenes were expressed in neutrophils throughout the CHT (Figure 2),  
207 demonstrating that *lyz:MPO-mEmerald* is expressed in zebrafish neutrophils in  
208 stably transgenic larvae.

209

#### 210 **MPO-mEmerald is trafficked to a subcellular location**

211 As MPO is located in the primary granules of neutrophils prior to delivery to the  
212 phagosome (1), we wished to determine whether the *lyz:MPO-mEmerald* transgene  
213 recapitulates MPO expression in human neutrophils. To investigate the intracellular  
214 localisation of the MPO transgene, *Tg(lyz:MPO-mEmerald,cm1c2:eGFP)sh496* fish  
215 were outcrossed to *Tg(lyz:nfsB-mCherry)sh260* fish, and at 3dpf the double-  
216 transgenic larvae were imaged in high detail using an Airyscan confocal microscope.  
217 Both transgenes are expressed in the same cells, with MPO-mEmerald localising  
218 with a granular subcellular distribution (Figure 3), suggesting that the MPO-  
219 mEmerald fusion protein is trafficked to and packaged within neutrophil granules.  
220 Additionally, as observed in Figure 1D, complete labelling of a neutrophil with  
221 mCherry is visible, while mEmerald is only observed on specific subcellular locations  
222 (Figure 3C), suggesting that the subcellular location of mCherry and mEmerald  
223 differs.

224

## 225 **MPO-mEmerald does not disrupt neutrophil migration**

226 In addition to its role in potentiating ROS generation in neutrophils, MPO also  
227 influences neutrophil migration to inflammatory stimuli (8). Accordingly, we sought to  
228 determine whether *Tg(lyz:MPO-mEmerald,cmlc2:eGFP)sh496* fish exhibit disrupted  
229 neutrophil migration to inflammatory and infectious stimuli. To answer these  
230 questions, *Tg(lyz:MPO-mEmerald,cmlc2:eGFP)sh496* fish were crossed to  
231 *Tg(lyz:nfsB-mCherry)sh260* and at 3dpf their larvae were separated into two groups:  
232 non-humanised (*lyz:nfsB-mCherry* only) and humanised (*lyz:MPO-mEmerald*;  
233 *lyz:nfsB-mCherry*) to determine how expression of MPO-mEmerald affects these  
234 responses.

235 To assess neutrophil migration to inflammatory stimuli, we used a tailfin-transection  
236 model that initiates neutrophil recruitment to a vertically transected tailfin injury in  
237 zebrafish larvae (25). Non-humanised and humanised larvae were injured and  
238 neutrophil recruitment to the site of injury was imaged at 3 and 6 hours post injury  
239 (hpi) (Figure 4A). Both groups exhibited comparable migration of neutrophils to the  
240 site of injury at 3 and 6hpi (Figure 4B), suggesting that *lyz:MPO-mEmerald* does not  
241 interfere with neutrophil recruitment to sites of injury.

242 To determine whether the neutrophil response to infection is affected by  
243 expression of *lyz:MPO-mEmerald*, we used an otic vesicle infection model to  
244 investigate neutrophil recruitment (33,34). After separating larvae into non-  
245 humanised and humanised groups, they were injected into the otic vesicle with either  
246 a PBS vehicle control or *S. aureus* USA300 at 3dpf. The larvae were then fixed in  
247 paraformaldehyde at 4 hours post infection (hpi) and stained with Sudan Black B to  
248 detect neutrophils. Injection of *S. aureus* USA300 induces robust recruitment of  
249 neutrophils to the otic vesicle, with comparable numbers recruited between non-

250 humanised and humanised larvae (Figure 4CD). This confirms that expression of the  
251 *lyz:MPO-mEmerald* transgene does not interfere with neutrophil recruitment to sites  
252 of infection.

253

254 **Genotypic and functional identification of myeloperoxidase-null Spotless**  
255 **(*mpx<sup>NL144</sup>*) larvae**

256 While the *lyz:MPO-mEmerald* transgene is expressed in zebrafish neutrophils in a  
257 manner that recapitulates expression in human neutrophils, it was still unknown  
258 whether MPO-mEmerald is expressed as a functional enzyme. To determine  
259 whether MPO was functional, we sought to create a zebrafish that expresses only  
260 human MPO by removing expression of the endogenous zebrafish myeloperoxidase  
261 (*mpx*) from the *Tg(lyz:MPO-mEmerald,cmlc2:eGFP)sh496* line. This was achieved  
262 using an existing zebrafish line known as Spotless (*mpx<sup>NL144</sup>*), which possesses a  
263 premature stop codon in the first exon of the *mpx* gene (31). Once acquired, we  
264 aimed to cross the Spotless line to our *Tg(lyz:MPO-mEmerald,cmlc2:eGFP)sh496*  
265 line to create a line that expresses only human MPO. Before we could create this  
266 line, it was necessary to develop a genotyping protocol that could accurately identify  
267 Spotless *mpx<sup>NL144</sup>* fish.

268 The *mpx<sup>NL144</sup>* allele can be identified by PCR amplification of the mutated  
269 gene from genomic DNA, followed by restriction digest of the PCR product. The  
270 restriction enzyme *BtsCI* recognises 5' GG ATG NN 3' sites in DNA, one of which is  
271 present within the mutated *mpx<sup>NL144</sup>* gene (GGA TGA) but not the wild-type *mpx<sup>wt</sup>*  
272 gene (GGA CGA), allowing the enzyme to determine the presence of a *mpx<sup>NL144</sup>*  
273 allele (Figure 5A). The PCR primers were successful in amplifying the region in the  
274 *mpx* gene from *mpx<sup>wt</sup>*, *mpx<sup>NL144</sup>* and *mpx<sup>wt/NL144</sup>* groups (Figure 5B), and once

275 digested with *Bts*CI produced different DNA fragments depending on the *mpx*<sup>NL144</sup>  
276 allele of the fish (Figure 5C), confirming *Bts*CI digestion as an efficient means of  
277 identifying the *mpx*<sup>NL144</sup> allele. The accuracy of the restriction digest was confirmed  
278 further by sequencing the PCR products, confirming that the fish identified by  
279 restriction digest each have the specific basepair in the expected position (Figure  
280 5D). After adults were genotyped, their larvae were then assessed for functional  
281 myeloperoxidase expression using the myeloperoxidase-dependent stain Sudan  
282 Black B (8), which verified the genotyping results (Figure 5E).

283

#### 284 **MPO-mEmerald is non-functional in zebrafish neutrophils**

285 To create zebrafish larvae expressing only human MPO, the *Tg(lyz:MPO-*  
286 *mEmerald,cmlc2:eGFP)sh496* line was crossed to the Spotless line to create  
287 zebrafish that express the *lyz:MPO-mEmerald* transgene and do not produce  
288 functional endogenous *mpx*. Once created, *Tg(lyz:MPO-*  
289 *mEmerald,cmlc2:eGFP)sh496; mpx*<sup>NL144</sup> larvae were stained with the  
290 myeloperoxidase-dependent stain Sudan Black B to determine whether this  
291 conferred staining; these larvae were compared against three sibling control groups  
292 – *mpx*<sup>NL144</sup>, *mpx*<sup>wt/NL144</sup> and *Tg(lyz:MPO-mEmerald,cmlc2:eGFP)sh496; mpx*<sup>wt/NL144</sup>.  
293 All groups tested containing a functioning *mpx* allele (*mpx*<sup>wt/NL144</sup>, *Tg(lyz:MPO-*  
294 *mEmerald,cmlc2:eGFP)sh496; mpx*<sup>wt/NL144</sup>) stained with Sudan Black B, indicating  
295 that the stain identifies functional endogenous myeloperoxidase (Figure 6). As  
296 expected, the negative control group did not stain (*mpx*<sup>NL144</sup>), but surprisingly, neither  
297 did the *Tg(lyz:MPO-mEmerald,cmlc2:eGFP)sh496; mpx*<sup>NL144</sup> human MPO-only  
298 larvae, indicating that the *lyz:MPO-mEmerald* transgene does not produce a  
299 functional MPO enzyme (Figure 6).

## 300 Discussion

301

302 In this study, we created a transgenic line expressing a fluorescently-tagged human  
303 myeloperoxidase in zebrafish neutrophils. Expression in neutrophils was determined  
304 by observing expression of *lyz:MPO-mEmerald* in the fluorescent red neutrophil line,  
305 *Tg(lyz:nfsB-mCherry)sh260*, which expresses mCherry in the cytoplasm of zebrafish  
306 neutrophils. Both transgenes were expressed within the same cell population,  
307 confirming that the *lyz:MPO-mEmerald* transgene labels neutrophils (Figure 1, 2).  
308 However, as MPO localises with the primary granules of neutrophils, it was essential  
309 that the fluorescent signal observed in the *lyz:MPO-mEmerald* line should differ from  
310 the cytoplasmic signal observed in the *Tg(lyz:nfsB-mCherry)sh260* line. This was  
311 observed in several instances; in double transgenic neutrophils, distinct areas of the  
312 cell remain unlabelled with mEmerald (Figures 1, 3) suggesting that MPO is  
313 translated and trafficked to a subcellular location that is distinct from the cytoplasm.  
314 This observation is also evident in Airyscan confocal images (Figure 3C), where a  
315 large unlabelled area of a double-transgenic neutrophil is visible in the mEmerald  
316 channel. This is likely to be a region of the cell that is inaccessible to the primary  
317 granules, for example the nucleus, and could be verified using a fluorescent nuclear  
318 probe.

319 In addition to the *lyz:MPO-mEmerald* and *lyz:nfsB-mCherry* signals being  
320 distinct, double-transgenic neutrophils contain small intracellular foci of mEmerald  
321 signal (Figure 3), suggesting that MPO-mEmerald might be targeted to the primary  
322 granules. To confirm that primary granules are labelled, imaging experiments could  
323 determine whether these bodies fuse with maturing phagosomes during infection to  
324 potentiate the ROS burst. Additionally, primary granules may be distinguished using

325 peroxidase-sensitive stains such as TSA or O-dianisidine (35–37), and may be used  
326 to confirm the observations shown here.

327 In addition to the role of MPO in antibacterial defence, it is also an important  
328 enzyme regulating the migration of neutrophils to sites of infection and inflammation,  
329 primarily by mediating H<sub>2</sub>O<sub>2</sub> flux (8). Using a combination of approaches for studying  
330 neutrophil migration, we found that expression of the *lyz:MPO-mEmerald* transgene  
331 does not interfere with neutrophil recruitment to sites of infection and inflammation  
332 (Figure 4). Currently, there are no existing tools for visualising neutrophil granules *in*  
333 *vivo*, and measuring MPO is limited to cytochemical and cytometry-based  
334 approaches (26). Therefore, the *Tg(lyz:MPO-mEmerald,cmlc2:eGFP)sh496*  
335 transgenic line may be used to study granule dynamics *in vivo* without disrupting  
336 neutrophil function.

337 In order to determine whether MPO-mEmerald is produced as a functional  
338 enzyme, it was necessary to produce zebrafish that do not express endogenous  
339 zebrafish myeloperoxidase. We describe here a genotyping protocol that can be  
340 used to identify Spotless (*mpx<sup>NL144</sup>*) fish, an *mpx*-null mutant line created in a  
341 separate study (31). This was accomplished by amplifying a region present in the  
342 first exon of the *mpx* gene, followed by restriction digest with *Bts*CI (Figure 5BCD);  
343 this was then functionally verified using the myeloperoxidase-dependent stain Sudan  
344 Black B (8) (Figure 5E). We believe this to be a useful and robust method for  
345 identifying Spotless fish, and may be useful in future studies.

346 Once a robust method for identifying Spotless fish was established, the  
347 Spotless line was crossed to the *Tg(lyz:MPO-mEmerald,cmlc2:eGFP)sh496* line to  
348 generate a line that expresses human MPO, and does not express zebrafish Mpx  
349 (known as *Tg(lyz:MPO-mEmerald,cmlc2:eGFP)sh496; mpx<sup>NL144</sup>*). By comparing



350 staining with Sudan Black B with sibling controls, we found that MPO-mEmerald is  
351 not produced as a functional enzyme, as *lyz:MPO-mEmerald* expression does not  
352 complement staining in the *mpx<sup>NL144</sup>* background. It is unclear why the *Tg(lyz:MPO-*  
353 *mEmerald,cmlc2:eGFP)sh496* line does not produce functional MPO, however it is  
354 important to note that MPO is a complex glycoprotein enzyme that undergoes  
355 numerous tightly regulated post-translational modifications. Before mature MPO is  
356 produced, the peptide associates with calreticulin and calnexin in the endoplasmic  
357 reticulum before undergoing a series of proteolytic events leading to insertion of a  
358 haem group and dimerisation of the enzyme, followed by glycosylation and ending  
359 with granule targeting (38). The importance of each step in producing a functional  
360 enzyme is unclear, however studies of myeloperoxidase-deficient individuals suggest  
361 that targeting to the primary granules universally correlates with functional MPO  
362 (15,39–41), and *in vitro* studies show that dimerisation is not required for enzyme  
363 function (7,42,43). Additionally, the discrepancy is unlikely to lie with calnexin and  
364 calreticulin, as they possess roughly 70% amino acid identity with the human  
365 chaperones, and are important during development of the zebrafish lateral line (44).  
366 Differences at any other stages may lead to incomplete MPO maturation and  
367 function in the zebrafish and consequently, the *Tg(lyz:MPO-*  
368 *mEmerald,cmlc2:eGFP)sh496* line may also be useful in investigating how MPO is  
369 processed and targeted to the granules during development.

370

## 371 Conclusion

372

373 We have generated a transgenic zebrafish line expressing fluorescently labelled  
374 human MPO within its neutrophils. The enzyme is non-functional and does not

375 interfere with neutrophil recruitment to sites of infection or inflammation, suggesting  
376 that it may be used to study granule dynamics *in vivo* interfering with neutrophil  
377 behaviour. Additionally, the *Tg(lyz:MPO-mEmerald,cmlc2:eGFP)sh496* line may be  
378 used to investigate processing and targeting of MPO during development, which is  
379 currently uncharacterised *in vivo*. Lastly, we provide a protocol for genotyping  
380 endogenous myeloperoxidase-null Spotless (*mpx<sup>NL144</sup>*) fish, which will prove useful in  
381 future studies investigating myeloperoxidase in the zebrafish.

## 382 References

383

- 384 1. Klebanoff SJ, Kettle a. J, Rosen H, Winterbourn CC, Nauseef WM.  
385 Myeloperoxidase: a front-line defender against phagocytosed microorganisms.  
386 Vol. 93, Journal of Leukocyte Biology. 2012. p. 185–98.
- 387 2. Kettle AJ, Winterbourn CC. Myeloperoxidase: a key regulator of neutrophil  
388 oxidant production. Redox Rep. 1997 Feb 13;3(1):3–15.
- 389 3. Borregaard N, Cowland JB. Granules of the human neutrophilic  
390 polymorphonuclear leukocyte. Blood. 1997 May 15;89(10):3503–21.
- 391 4. Decleva E, Menegazzi R, Busetto S, Patriarca P, Dri P. Common methodology  
392 is inadequate for studies on the microbicidal activity of neutrophils. J Leukoc  
393 Biol. 2006;79(1):87–94.
- 394 5. Aratani Y, Kura F, Watanabe H, Akagawa H, Takano Y, Suzuki K, et al. Critical  
395 Role of Myeloperoxidase and Nicotinamide Adenine Dinucleotide Phosphate –  
396 Oxidase in High-Burden Systemic Infection of Mice with *Candida albicans*. J  
397 Infect Dis. 2002;(April):1833–7.
- 398 6. Hirche TO, Gaut JP, Heinecke JW, Belaouaj A. Myeloperoxidase plays  
399 critical roles in killing *Klebsiella pneumoniae* and inactivating neutrophil  
400 elastase: effects on host defense. J Immunol. 2005 Feb 1;174(3):1557–65.
- 401 7. de Jong NWM, Ramyar KX, Guerra FE, Nijland R, Fevre C, Voyich JM, et al.  
402 Immune evasion by a staphylococcal inhibitor of myeloperoxidase. Proc Natl  
403 Acad Sci. 2017 Aug 29;114(35):9439–44.
- 404 8. Pase L, Layton JE, Wittmann C, Ellett F, Nowell CJ, Reyes-Aldasoro CC, et al.  
405 Neutrophil-delivered myeloperoxidase dampens the hydrogen peroxide burst  
406 after tissue wounding in zebrafish. Curr Biol. 2012;22(19):1818–24.
- 407 9. Schürmann N, Forrer P, Casse O, Li J, Felmy B, Burgener A, et al.  
408 Myeloperoxidase targets oxidative host attacks to *Salmonella* and prevents  
409 collateral tissue damage. Nat Microbiol. 2017 Jan 23;2(January):16268.
- 410 10. Kutter D, Devaquet P, Vanderstocken G, Paulus JM, Marchal V, Gothot A.  
411 Consequences of Total and Subtotal Myeloperoxidase Deficiency: Risk or  
412 Benefit? Acta Haematol. 2000;104(1):10–5.
- 413 11. Yang JJ, Pendergraft WF, Alcorta DA, Nachman PH, Hogan SL, Thomas RP,

- 414 et al. Circumvention of normal constraints on granule protein gene expression  
415 in peripheral blood neutrophils and monocytes of patients with antineutrophil  
416 cytoplasmic autoantibody-associated glomerulonephritis. *J Am Soc Nephrol*.  
417 2004 Aug 1;15(8):2103–14.
- 418 12. Chen JW, Breckwoldt MO, Aikawa E, Chiang G, Weissleder R.  
419 Myeloperoxidase-targeted imaging of active inflammatory lesions in murine  
420 experimental autoimmune encephalomyelitis. *Brain*. 2008;131(4):1123–33.
- 421 13. Brennan M-L, Anderson MM, Shih DM, Qu X-D, Wang X, Mehta AC, et al.  
422 Increased atherosclerosis in myeloperoxidase-deficient mice. *J Clin Invest*.  
423 2001 Feb 15;107(4):419–30.
- 424 14. Shvedova AA, Kapralov AA, Feng WH, Kisin ER, Murray AR, Mercer RR, et al.  
425 Impaired clearance and enhanced pulmonary inflammatory/fibrotic response to  
426 carbon nanotubes in myeloperoxidase-deficient mice. *PLoS One*. 2012 Mar  
427 30;7(3):e30923.
- 428 15. DeLeo FR, Goedken M, McCormick SJ, Nauseef WM. A novel form of  
429 hereditary myeloperoxidase deficiency linked to endoplasmic  
430 reticulum/proteasome degradation. *J Clin Invest*. 1998 Jun 15;101(12):2900–9.
- 431 16. Lehrer RI, Cline MJ. Leukocyte myeloperoxidase deficiency and disseminated  
432 candidiasis: the role of myeloperoxidase in resistance to *Candida* infection. *J*  
433 *Clin Invest*. 1969;48(8):1478–88.
- 434 17. Assari T. Chronic Granulomatous Disease; fundamental stages in our  
435 understanding of CGD. *Med Immunol*. 2006;5:4.
- 436 18. Paquet D, Bhat R, Sydow A, Mandelkow E-M, Berg S, Hellberg S, et al. A  
437 zebrafish model of tauopathy allows in vivo imaging of neuronal cell death and  
438 drug evaluation. *J Clin Invest*. 2009 May;119(5):1382–95.
- 439 19. Haldi M, Ton C, Seng WL, McGrath P. Human melanoma cells transplanted  
440 into zebrafish proliferate, migrate, produce melanin, form masses and  
441 stimulate angiogenesis in zebrafish. *Angiogenesis*. 2006;9(3):139–51.
- 442 20. Langenau DM, Traver D, Ferrando AA, Kutok JL, Aster JC, Kanki JP, et al.  
443 Myc-induced T cell leukemia in transgenic zebrafish. *Science*. 2003 Feb  
444 7;299(5608):887–90.
- 445 21. Kwan KM, Fujimoto E, Grabher C, Mangum BD, Hardy ME, Campbell DS, et  
446 al. The Tol2kit: A multisite gateway-based construction Kit for Tol2 transposon

- 447 transgenesis constructs. *Dev Dyn.* 2007 Nov;236(11):3088–99.
- 448 22. Ellett F, Pase L, Hayman JW, Andrianopoulos A, Lieschke GJ. mpeg1  
449 promoter transgenes direct macrophage-lineage expression in zebrafish.  
450 *Blood.* 2011 Jan 27;117(4):e49-56.
- 451 23. Hall C, Flores MV, Storm T, Crosier K, Crosier P. The zebrafish lysozyme C  
452 promoter drives myeloid-specific expression in transgenic fish. *BMC Dev Biol.*  
453 2007 May 4;7(1):42.
- 454 24. Elks PM, Brizee S, van der Vaart M, Walmsley SR, van Eeden FJ, Renshaw S  
455 a, et al. Hypoxia inducible factor signaling modulates susceptibility to  
456 mycobacterial infection via a nitric oxide dependent mechanism. *PLoS Pathog.*  
457 2013 Jan;9(12):e1003789.
- 458 25. Renshaw SA, Loynes CA, Trushell DMI, Elworthy S, Ingham PW, Whyte MKB.  
459 A transgenic zebrafish model of neutrophilic inflammation. *Blood.* 2006 Dec  
460 15;108(13):3976–8.
- 461 26. Pulli B, Ali M, Forghani R, Schob S, Hsieh KLC, Wojtkiewicz G, et al.  
462 Measuring myeloperoxidase activity in biological samples. *PLoS One.* 2013 Jul  
463 5;8(7):e67976.
- 464 27. Kikushima K, Kita S, Higuchi H. A non-invasive imaging for the in vivo tracking  
465 of high-speed vesicle transport in mouse neutrophils. *Sci Rep.* 2013 Dec  
466 31;3(1):1913.
- 467 28. Nauseef WM. The proper study of mankind. *J Clin Invest.* 2001 Feb  
468 3;107(4):401–3.
- 469 29. Rausch PG, Moore TG. Granule enzymes of polymorphonuclear neutrophils: A  
470 phylogenetic comparison. *Blood.* 1975 Dec;46(6):913–9.
- 471 30. Nüsslein-Volhard C, Dahm R. *Zebrafish: A Practical Approach.* Practical.  
472 Oxford; New York: Oxford University Press, c2002.; 2002.
- 473 31. Elks PM, van der Vaart M, van Hensbergen V, Schutz E, Redd MJ, Murayama  
474 E, et al. Mycobacteria counteract a TLR-mediated nitrosative defense  
475 mechanism in a zebrafish infection model. *PLoS One.* 2014 Jun  
476 26;9(6):e100928.
- 477 32. Murayama E, Kissa K, Zapata A, Mordelet E, Briolat V, Lin H-F, et al. Tracing  
478 Hematopoietic Precursor Migration to Successive Hematopoietic Organs

- 479 during Zebrafish Development. *Immunity*. 2006 Dec;25(6):963–75.
- 480 33. Benard EL, van der Sar AM, Ellett F, Lieschke GJ, Spaink HP, Meijer AH.  
481 Infection of zebrafish embryos with intracellular bacterial pathogens. *J Vis Exp*.  
482 2012 Mar 15;(61):1–8.
- 483 34. Deng Q, Sarris M, Bennin D a, Green JM, Herbomel P, Huttenlocher A.  
484 Localized bacterial infection induces systemic activation of neutrophils through  
485 Cxcr2 signaling in zebrafish. *J Leukoc Biol*. 2013 May;93(5):761–9.
- 486 35. Gilbert CS, Parmley RT, Rice WG, Kinkade JM. Heterogeneity of peroxidase-  
487 positive granules in normal human and Chediak- Higashi neutrophils. *J*  
488 *Histochem Cytochem*. 1993;41(6):837–49.
- 489 36. Lieschke GJ, Oates AC, Crowhurst MO, Ward AC, Layton JE. Morphologic  
490 and functional characterization of granulocytes and macrophages in embryonic  
491 and adult zebrafish. *Blood*. 2001 Nov 15;98(10):3087–96.
- 492 37. Robertson AL, Holmes GR, Bojarczuk AN, Burgon J, Loynes CA, Chimen M,  
493 et al. A Zebrafish Compound Screen Reveals Modulation of Neutrophil  
494 Reverse Migration as an Anti-Inflammatory Mechanism. *Sci Transl Med*. 2014  
495 Feb 26;6(225):225ra29-225ra29.
- 496 38. Hansson M, Olsson I, Nauseef WM. Biosynthesis, processing, and sorting of  
497 human myeloperoxidase. *Arch Biochem Biophys*. 2006 Jan 15;445(2):214–24.
- 498 39. Nauseef WM. Lessons from MPO deficiency about functionally important  
499 structural features. *Jpn J Infect Dis*. 2004;57(5):4–5.
- 500 40. Nauseef WM, Cogley M, McCormick S. Effect of the R569W missense  
501 mutation on the biosynthesis of myeloperoxidase. *J Biol Chem*.  
502 1996;271(16):9546–9.
- 503 41. Nauseef WM, McCormick S, Goedken M. Impact of missense mutations on  
504 biosynthesis of myeloperoxidase. *Redox Rep*. 2000;5(4):197–206.
- 505 42. Moguevsky N, Garcia-Quintana L, Jacquet A, Tournay C, Fabry L, Piérard L,  
506 et al. Structural and biological properties of human recombinant  
507 myeloperoxidase produced by Chinese hamster ovary cell lines. *Eur J*  
508 *Biochem*. 1991 May 8;197(3):605–14.
- 509 43. Andrews PC, Krinsky NI. The reductive cleavage of myeloperoxidase in half,  
510 producing enzymically active hemi-myeloperoxidase. *J Biol Chem*. 1981 May

511 10;256(9):4211–8.

512 44. Hung I-C, Cherng B-W, Hsu W-M, Lee S-J. Calnexin is required for zebrafish  
513 posterior lateral line development. *Int J Dev Biol.* 2013;57(5):427–38.

514

## 515 Acknowledgements

516

517 K.D.B performed all experiments with assistance from M.v.G, N.W.M.d.J, and J.K.

518 S.A.R, J.A.G.v.S and S.J.F conceived the study and designed experiments. K.D.B

519 and S.A.R wrote the manuscript with significant input from all authors. Thank you to

520 Annemarie Meijer's group for providing the Spotless (*mpx<sup>NL144</sup>*) line, to the Bateson

521 Centre aquarium staff for all their help, and to the Wolfson Light Microscopy Facility.

522

## 523 Conflicts of Interest

524

525 The authors declare no conflicts of interest.

526

## 527 Funding Information

528

529 This work was supported in part by AMR cross-council funding from the MRC to the

530 SHIELD consortium "Optimising Innate Host Defence to Combat Antimicrobial

531 Resistance" MRNO2995X/1. Microscopy studies were supported by a Wellcome

532 Trust grant to the Molecular Biology and Biotechnology/Biomedical Science Light

533 Microscopy Facility (GR077544AIA).



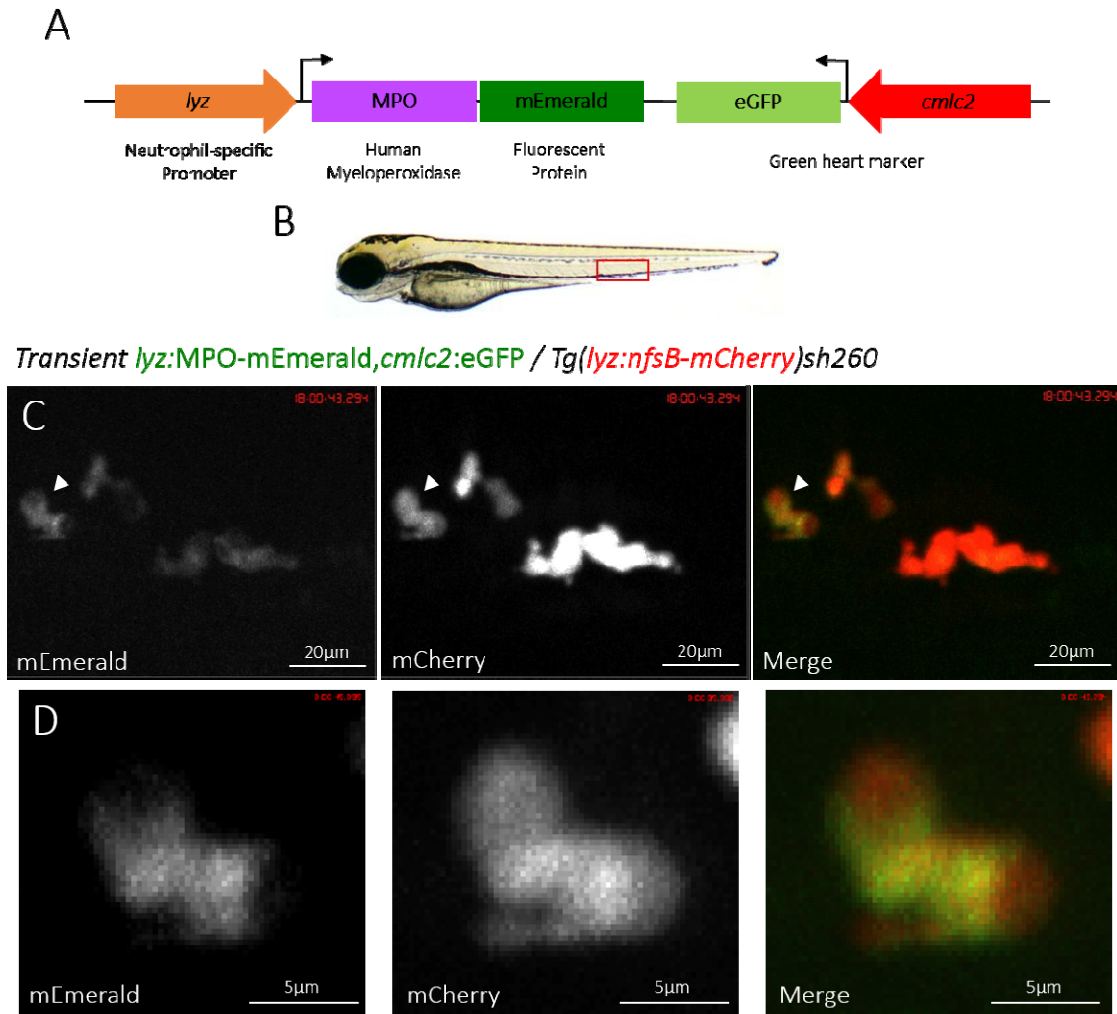

534

535

536 **Figure 1. Transient expression of the *lyz:MPO-mEmerald* transgene labels**  
537 **zebrafish neutrophils**

538 **A)** Schematic of the *lyz:MPO-mEmerald cmIc2:eGFP* construct, which includes the  
539 neutrophil-specific promoter (*lyz*), the MPO gene with a C-terminal fluorescent tag  
540 (MPO-mEmerald) and a green heart marker to aid optimisation of transgenesis  
541 (*cmIc2:eGFP*). **B)** A zebrafish larva at 3 days post fertilisation (dpf), with the caudal  
542 haematopoietic tissue (CHT) indicated by the red box. **C)** The CHT of a double-  
543 transgenic *Transient lyz:MPO-mEmerald,cmIc2:eGFP; Tg(lyz:nfsB-mCherry)sh260*  
544 larva with a population of neutrophils expressing both mEmerald and mCherry. The

545 white arrowhead indicates the neutrophil enlarged below. **D)** Enlarged view of a  
546 neutrophil expressing mEmerald and mCherry.

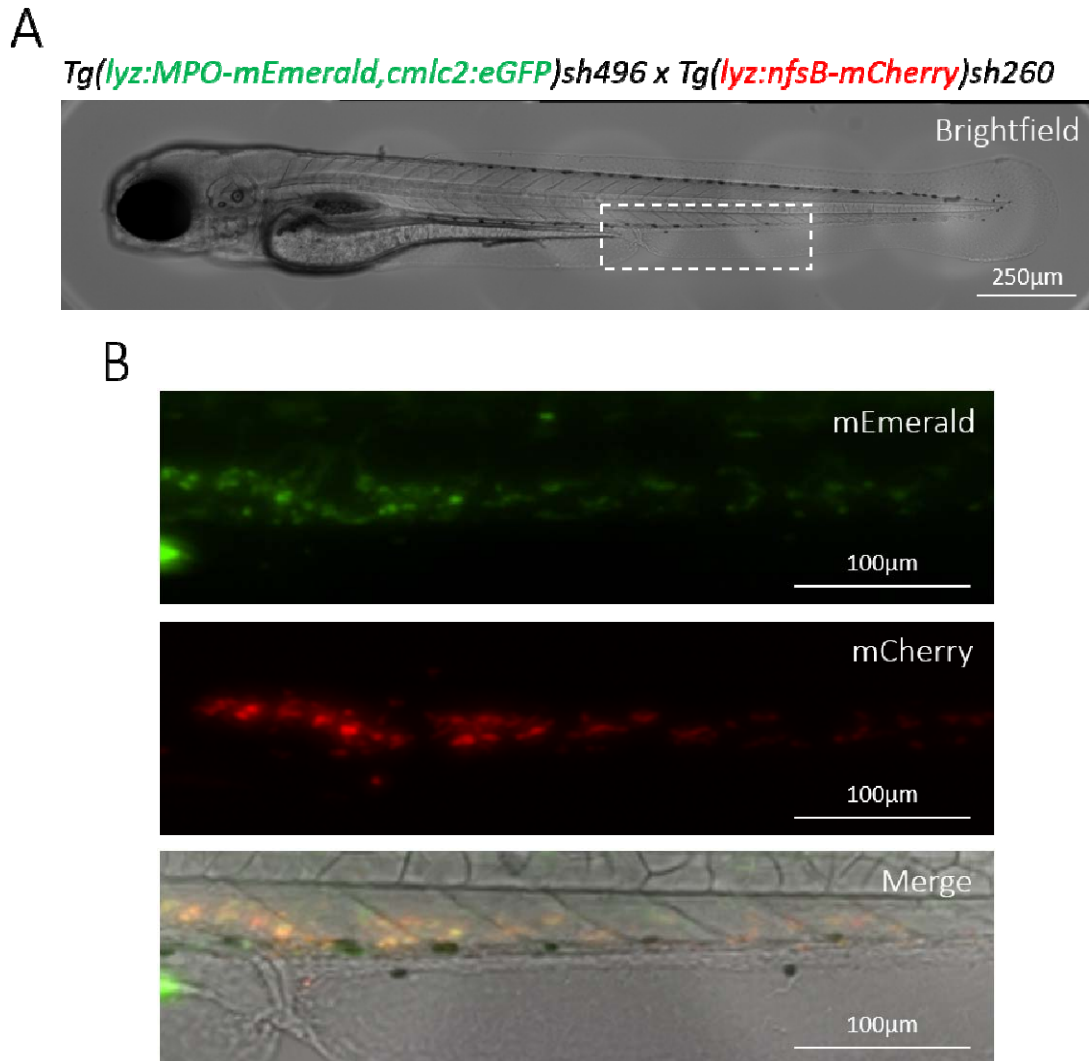

547

548

549 **Figure 2.** Transgenic *Tg(lyz:MPO-mEmerald,cmlc2:eGFP)sh496* zebrafish

550 stably express the transgene in zebrafish neutrophils

551 **A)** A brightfield view of a double-transgenic *Tg(lyz:MPO-*

552 *mEmerald,cmlc2:eGFP)sh496; Tg(lyz:nfsB-mCherry)sh260* zebrafish larva at 3dpf.

553 The dashed white box indicates the enlarged region shown in B). **B)** mEmerald and

554 mCherry expression in the CHT of the larva shown in A).

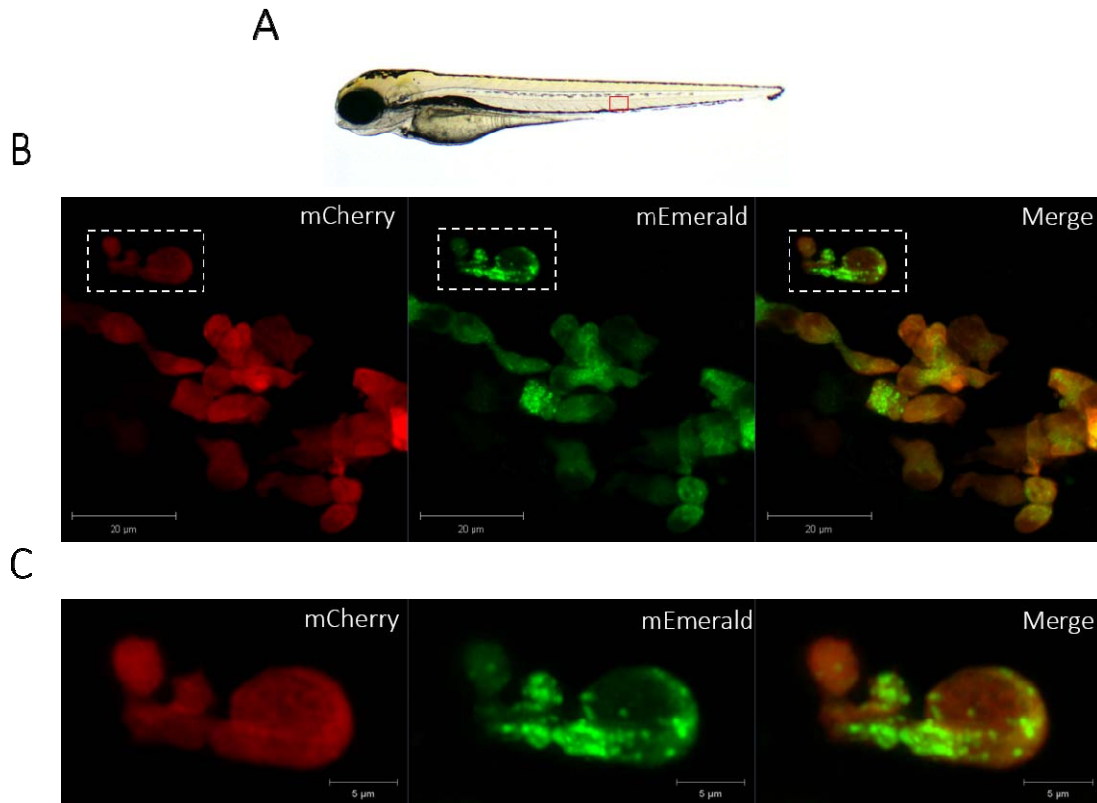

555

556

557 **Figure 3. The *lyz:MPO-mEmerald* transgene labels intracellular neutrophil**

558 **granules**

559 **A)** A 3dpf zebrafish larva, the field of view shown in B) is outlined by the red box. **B)**

560 An Airyscanner confocal image of neutrophils within the CHT of a double-transgenic

561 *Tg(lyz:MPO-mEmerald,cmlc2:eGFP)sh496; Tg(lyz:nfsB-mCherry)sh260* larva at

562 3dpf. **C)** An enlarged image of the neutrophil highlighted by the dashed white box in

563 B). Scale bars **B)** 20μm and **C)** 5μm.

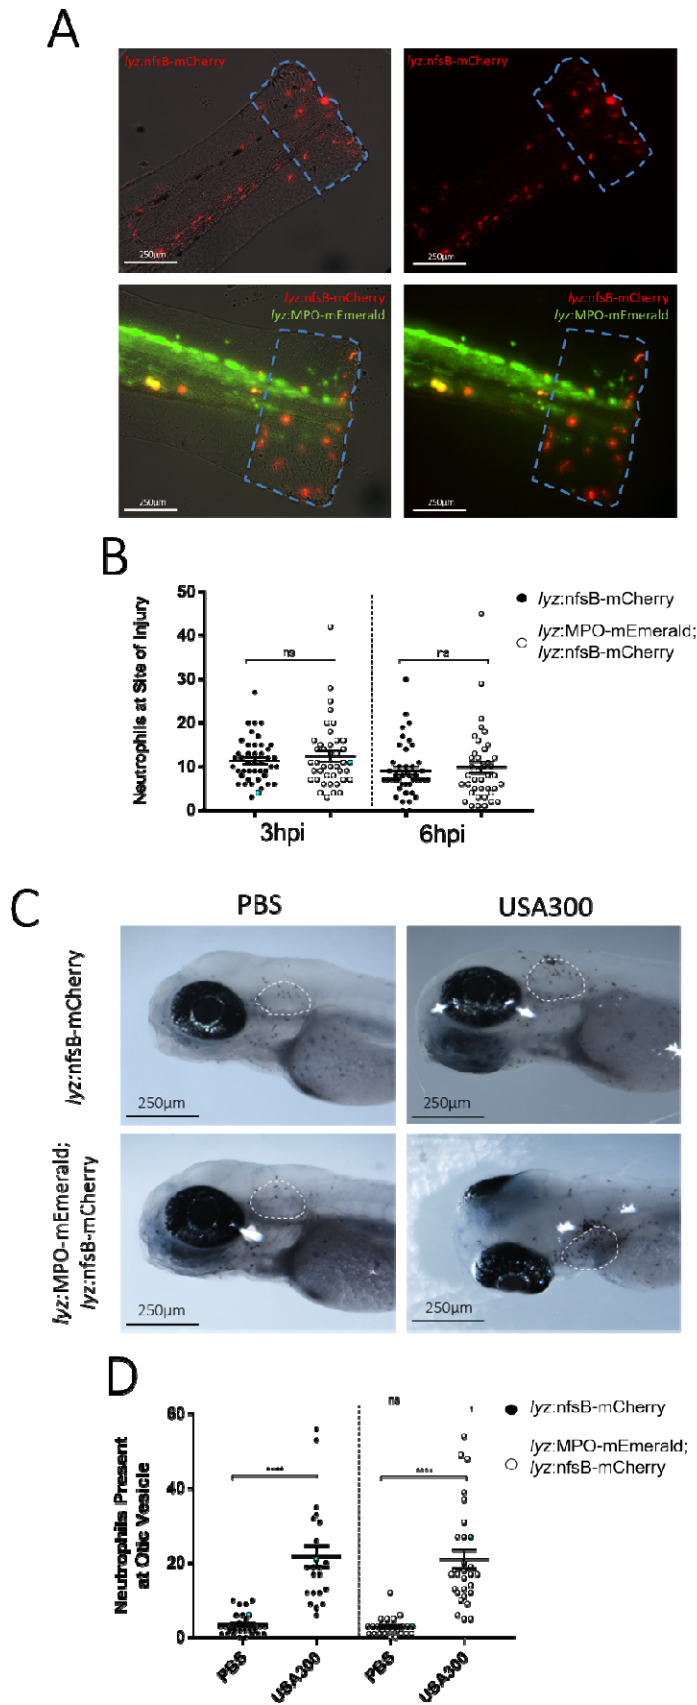

565 **Figure 4. Transgene expression does not disrupt neutrophil recruitment to**  
566 **sites of injury or infection**

567 **A)** Non-humanised (*lyz:nfsB-mCherry* only) and humanised (*lyz:MPO-mEmerald*;  
568 *lyz:nfsB-mCherry*) 3dpf larvae with tailfins transected to induce neutrophil  
569 recruitment; dashed outline represents the area in which neutrophils were counted.  
570 Scale bar = 250µm. **B)** Neutrophils present at the site of injury at 3 and 6 hours post  
571 injury (hpi); blue points denote the representative images in A). Error bars shown are  
572 mean ± SEM (n=45 over three independent experiments); groups were analysed  
573 using an ordinary two-way ANOVA and adjusted using Bonferroni's multiple  
574 comparisons test; ns, p>0.9999. **C)** Non-humanised and humanised larvae injected  
575 with either a PBS vehicle control or 1,400cfu *S. aureus* USA300 into the otic vesicle  
576 at 3dpf, then fixed in paraformaldehyde at 4 hours post infection (hpi) and stained  
577 with Sudan Black B to detect neutrophils; dashed white outline indicates the otic  
578 vesicle. **D)** Neutrophils present at the otic vesicle at 4hpi. Scale bars = 250µm. Error  
579 bars shown are mean ± SEM (n=25 over two independent experiments); groups  
580 were analysed using an ordinary two-way ANOVA and adjusted using Bonferroni's  
581 multiple comparisons test. \*\*\*\*, p<0.0001; ns, p>0.9999.

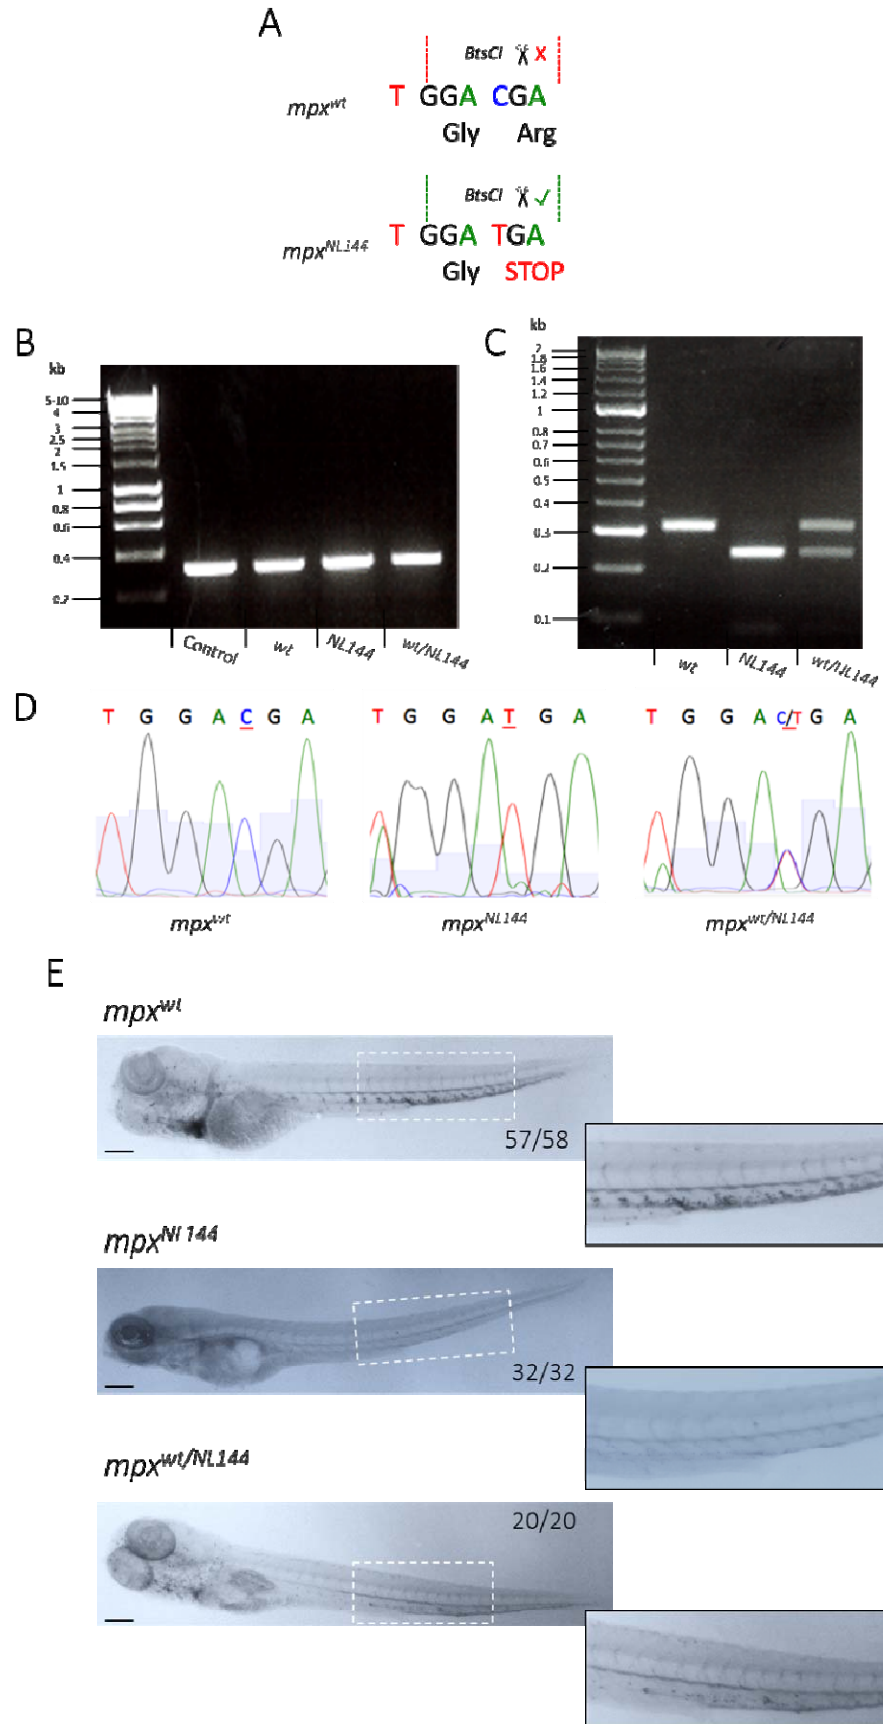

583 **Figure 5. Genotyping and verifying *mpx*-null zebrafish larvae**

584 **A)** Diagram of a WT (*mpx*<sup>wt</sup>) and mutated (*mpx*<sup>NL144</sup>) gene, showing the *Bts*CI  
585 restriction site cutting only the mutated *mpx*<sup>NL144</sup> gene. **B)** PCR amplification of the  
586 *mpx* gene from the genomic DNA of *mpx*<sup>wt</sup>, *mpx*<sup>wt/NL144</sup> and *mpx*<sup>NL144</sup> fish – fragment  
587 312bp; control DNA is a positive control from a separate genotyping experiment.  
588 Hyperladder 1kb. **C)** Diagnostic digest of the PCR product from *mpx*<sup>wt</sup>, *mpx*<sup>wt/NL144</sup>  
589 and *mpx*<sup>NL144</sup> fish. Band sizes: *mpx*<sup>wt</sup>- 312bp, *mpx*<sup>NL144</sup>- 230bp, *mpx*<sup>wt/NL144</sup>- 312bp  
590 and 230bp. Hyperladder 100bp plus. **D)** DNA sequencing of the PCR products to  
591 confirm the accuracy of the *Bts*CI digest. **E)** *mpx*<sup>wt</sup>, *mpx*<sup>NL144</sup> and *mpx*<sup>wt/NL144</sup> larvae  
592 fixed at 4dpf and stained with Sudan Black B. Larvae with at least one functional  
593 *mpx* allele stained (57/58 *mpx*<sup>wt</sup>, 20/20 *mpx*<sup>wt/NL144</sup>) and larvae that do not produce  
594 Mpx did not stain (32/32 *mpx*<sup>NL144</sup>). Inset shows an enlarged view of the region  
595 indicated by the dashed white box. Scale bar = 200µm.



*mpx<sup>wt/NL144</sup>*

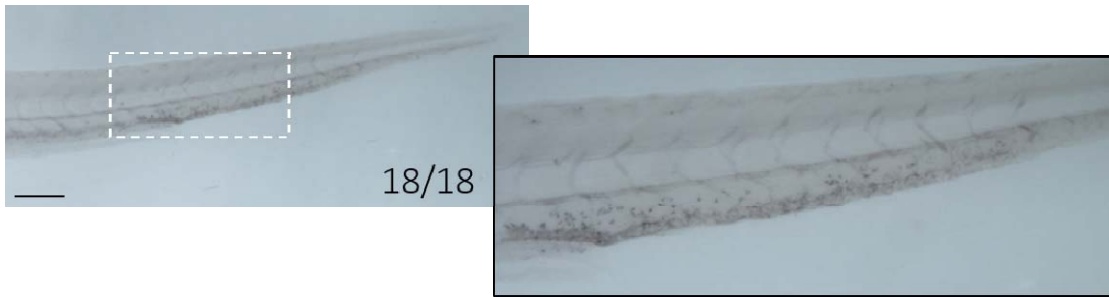

*Tg(lyz:MPO-mEmerald,cmlc2:eGFP)sh496; mpx<sup>wt/NL144</sup>*

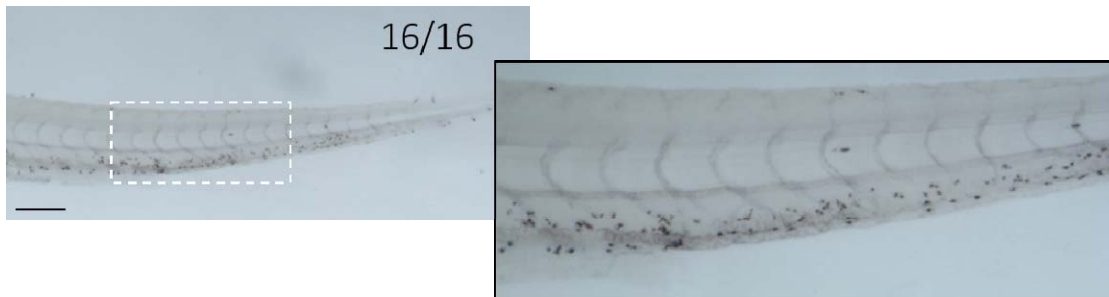

*mpx<sup>NL144</sup>*

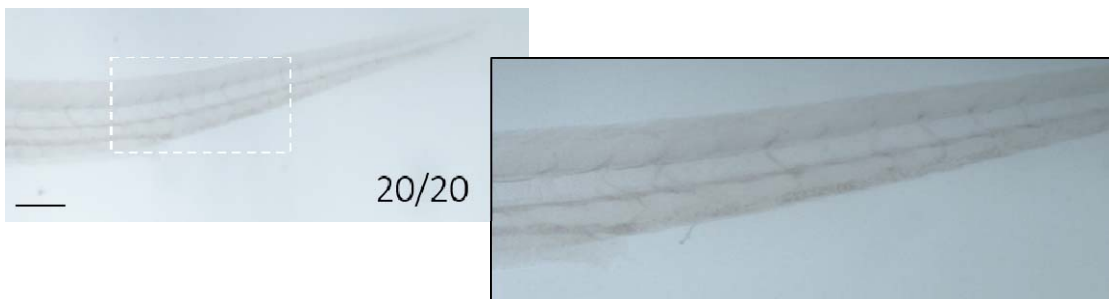

*Tg(lyz:MPO-mEmerald,cmlc2:eGFP)sh496; mpx<sup>NL144</sup>*

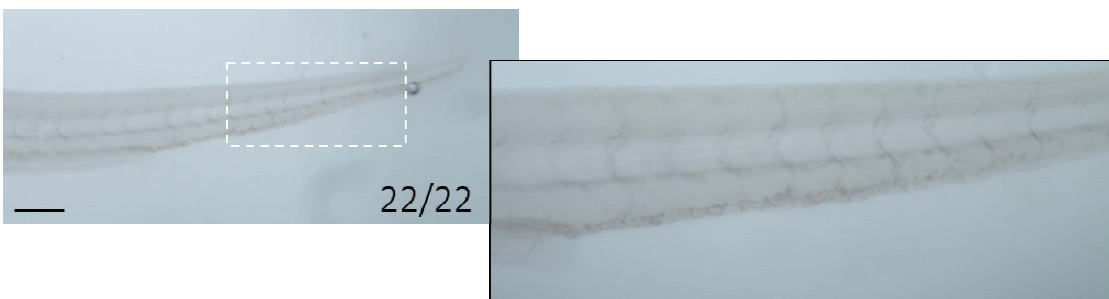

596

597

598 Figure 6. Larvae expressing only human MPO do not stain with  
599 myeloperoxidase-dependent Sudan Black B

600 Four groups of larvae were fixed at 4dpf and stained with Sudan Black B:  $mpx^{wt/NL144}$ ,  
601  $Tg(lyz:MPO-mEmerald,cmlc2:eGFP)sh496$ ;  $mpx^{wt/NL144}$ ,  $mpx^{NL144}$  and  $Tg(lyz:MPO-$   
602  $mEmerald,cmlc2:eGFP)sh496$ ;  $mpx^{NL144}$ .  $mpx^{wt/NL144}$  and  $Tg(lyz:MPO-$   
603  $mEmerald,cmlc2:eGFP)sh496$ ;  $mpx^{wt/NL144}$  stained (18/18, 16/16 respectively);  
604  $mpx^{NL144}$  and  $Tg(lyz:MPO-mEmerald,cmlc2:eGFP)sh496$ ;  $mpx^{NL144}$  did not stain  
605 (20/20, 22/22 respectively). Dashed outline indicates the enlarged region shown  
606 adjacent. Scale bar = 200 $\mu$ m.

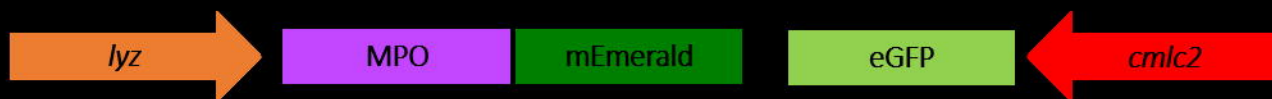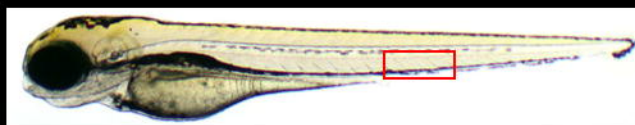

*lyz:MPO-mEmerald, cmc2:eGFP*

*lyz:nfsB-mCherry*

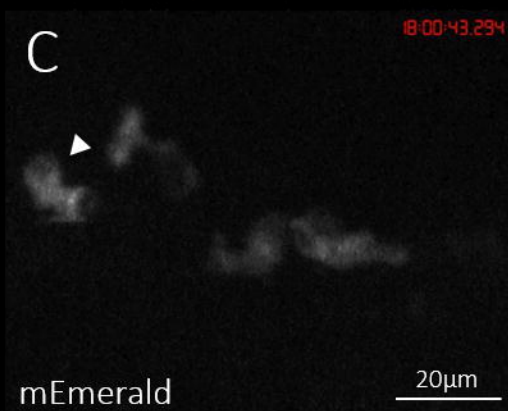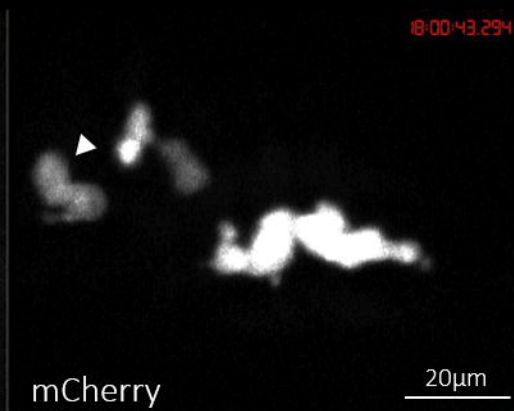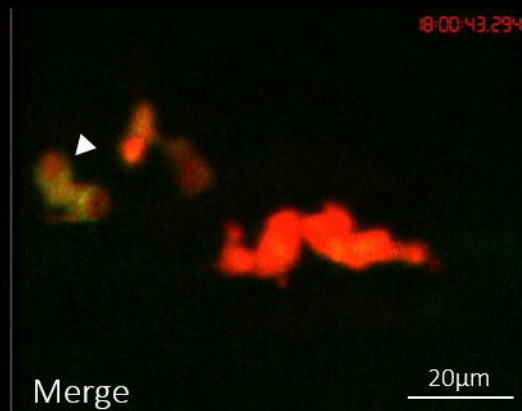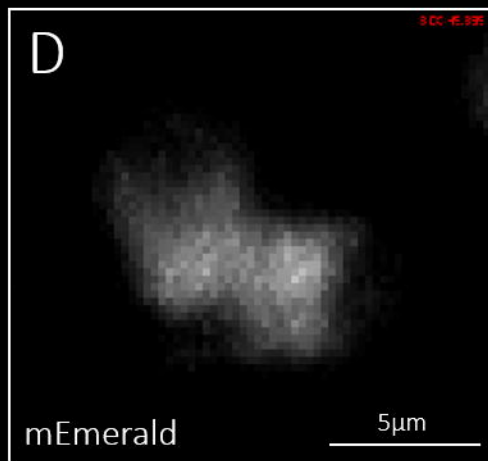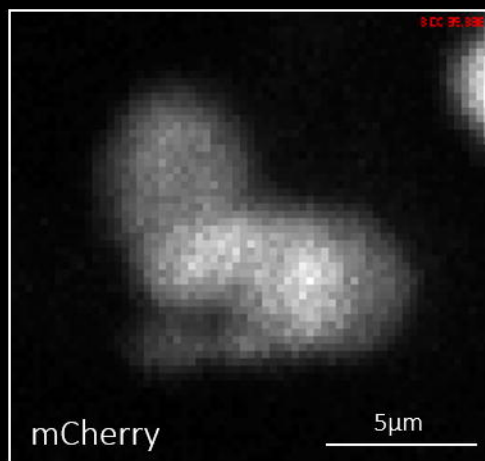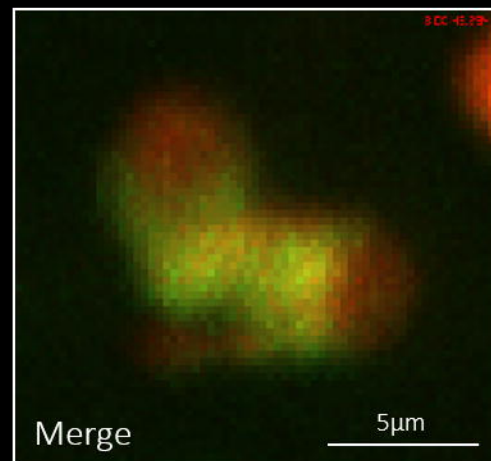

*lyz:MPO-mEmerald,cmlc2:eGFP*

*lyz:nfsB-mCherry*

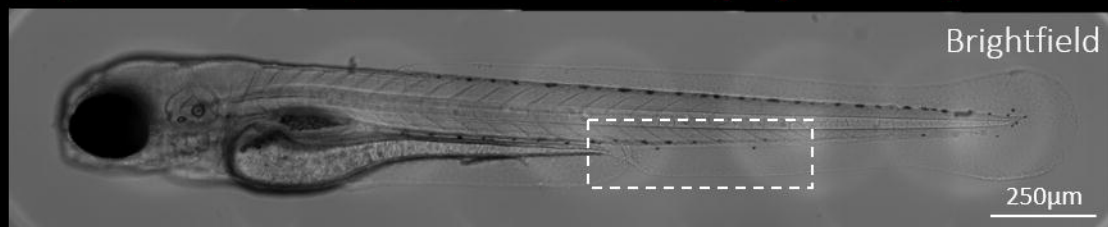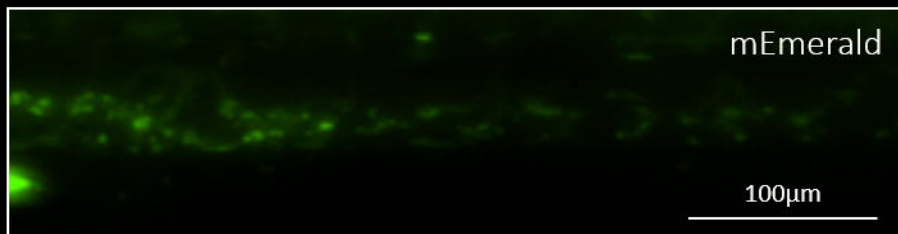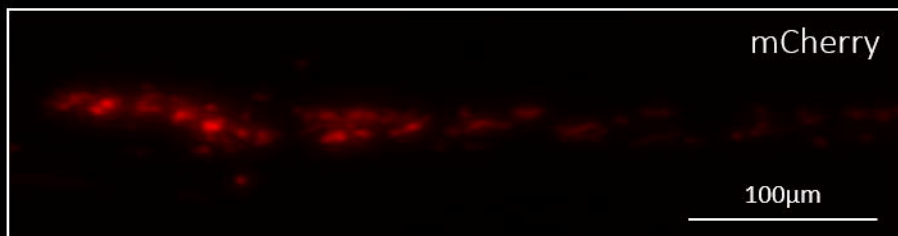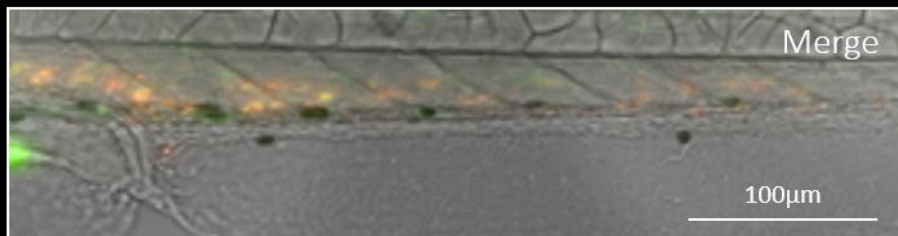

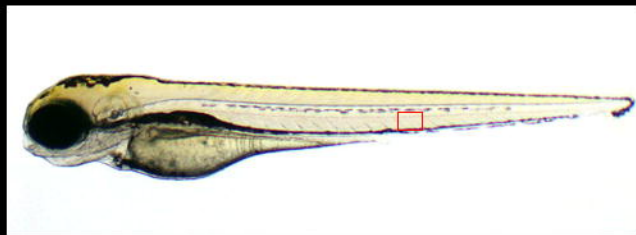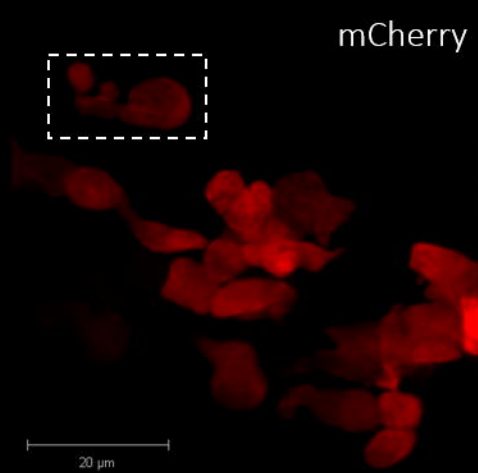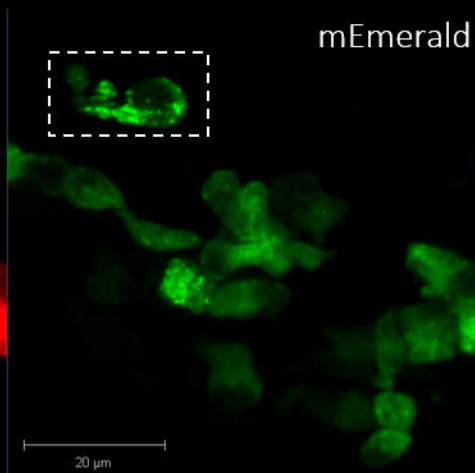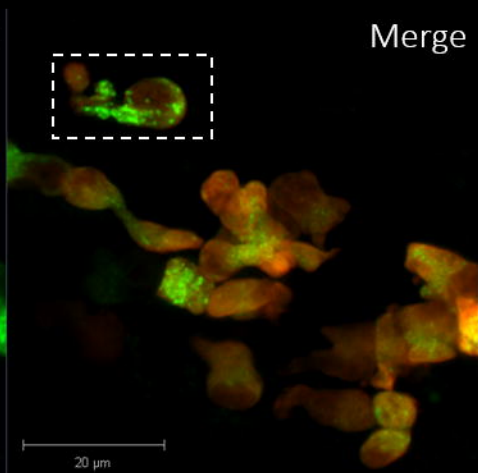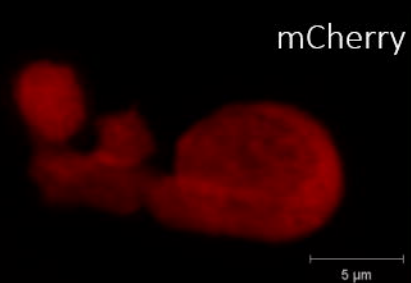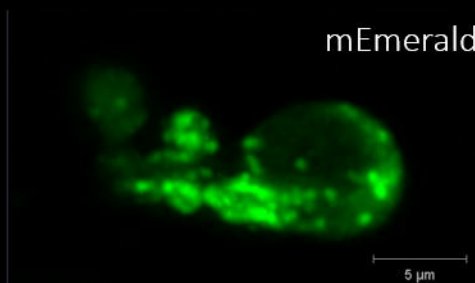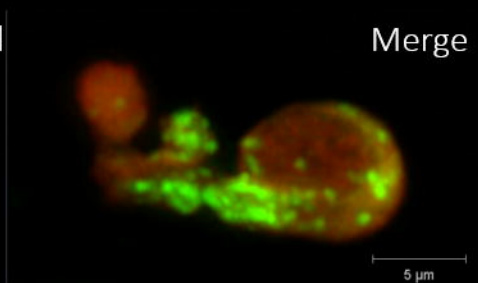

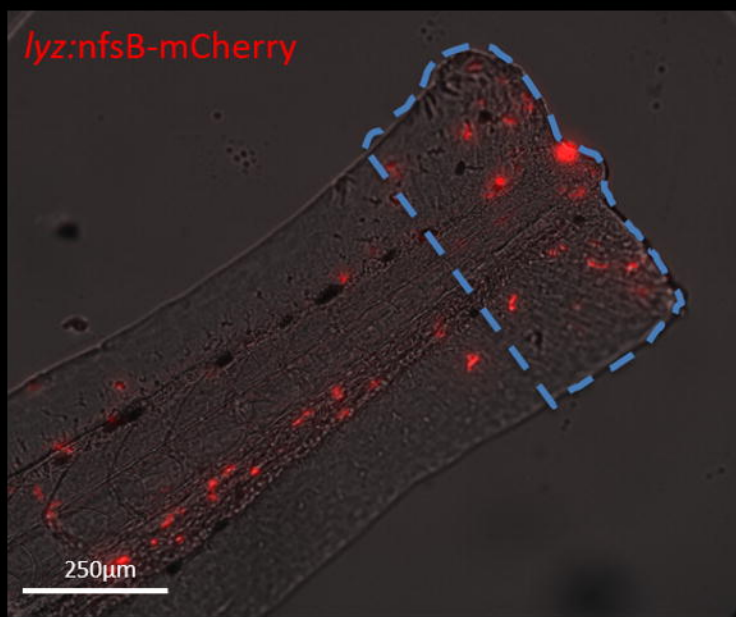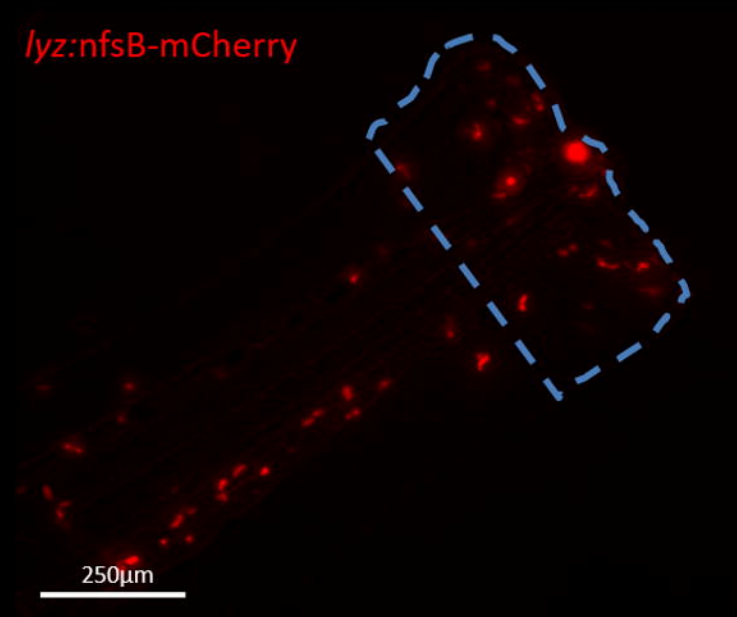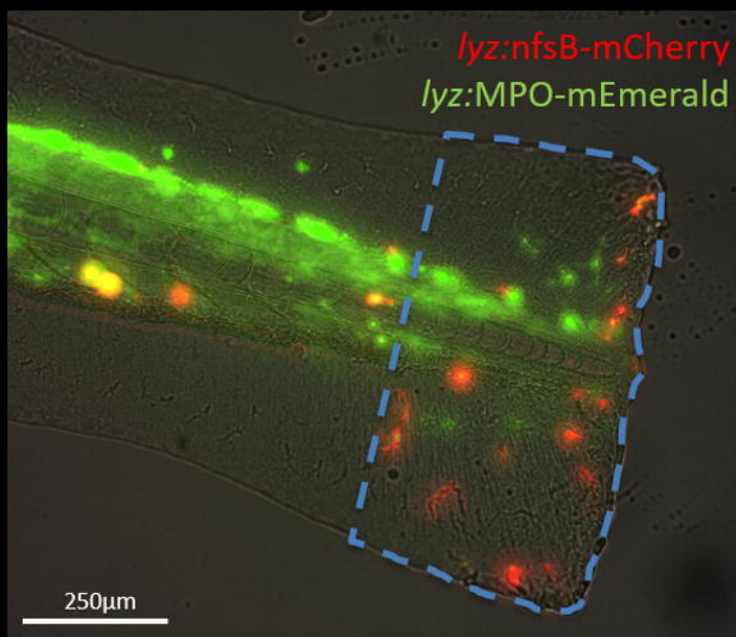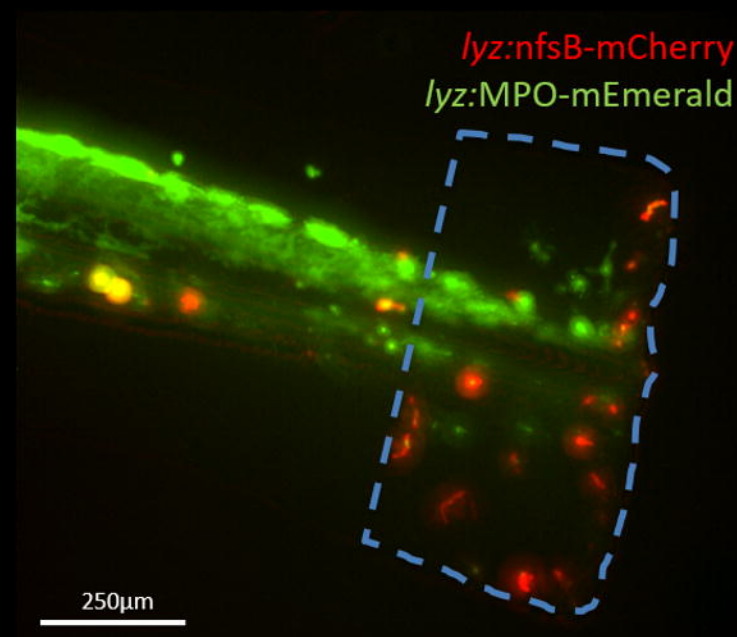

● *lyz:nfsB-mCherry*  
○ *lyz:MPO-mEmerald*;  
*lyz:nfsB-mCherry*

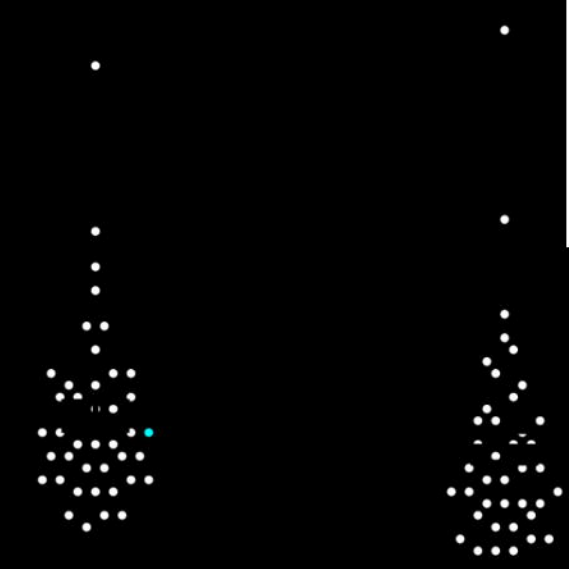

<https://doi.org/10.1101/456541>; this version posted October 30, 2018. The copyright holder for this preprint (which was not certified by peer review) is the author/funder. All rights reserved. No reuse allowed without permission.

er for this preprint (which was not certified by peer review) is the author/funder. All rights reserved. No reuse allowed without permission.

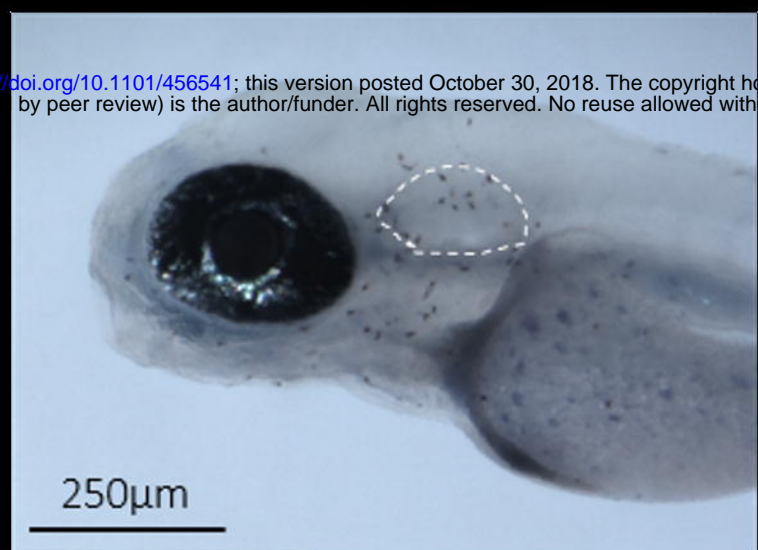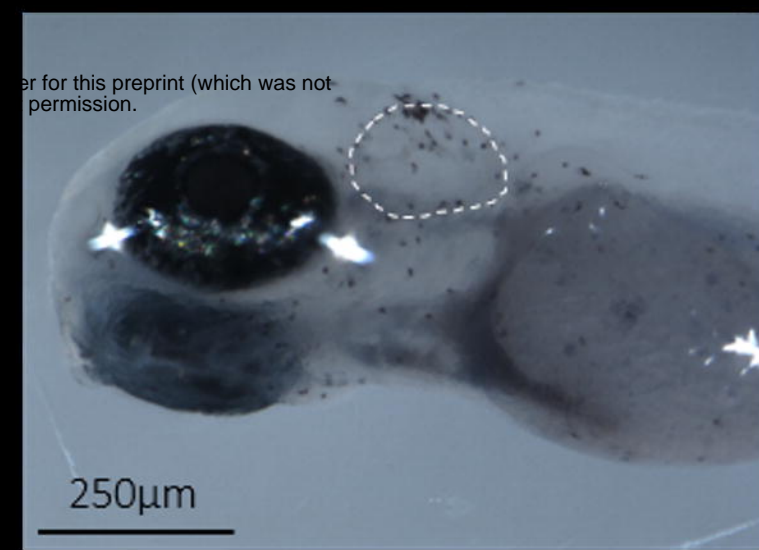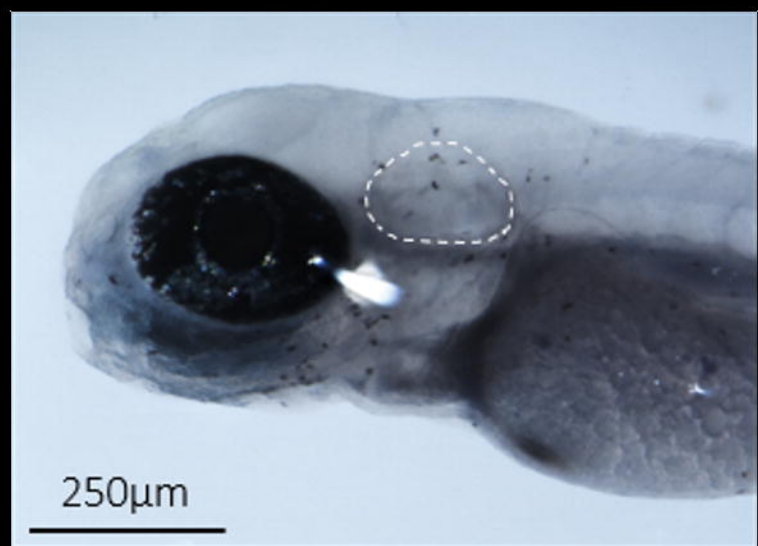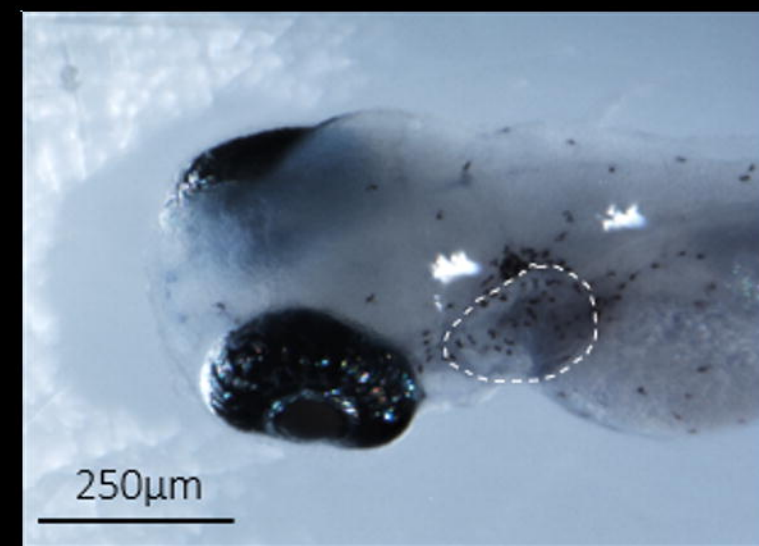

● *lyz:nfsB-mCherry*  
○ *lyz:MPO-mEmerald*;  
*lyz:nfsB-mCherry*

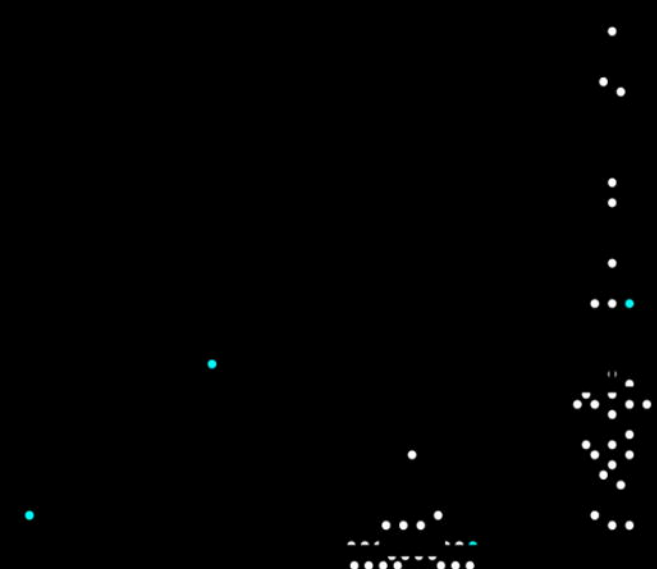

T A C A  
x

T A T A  
✓  
STOP

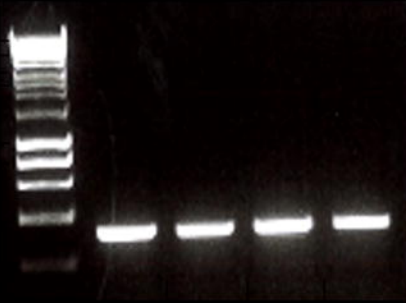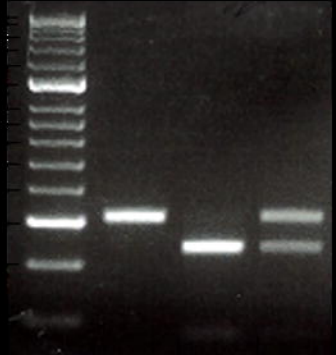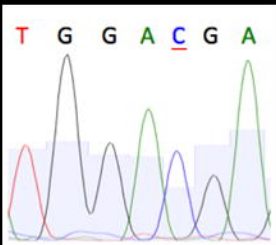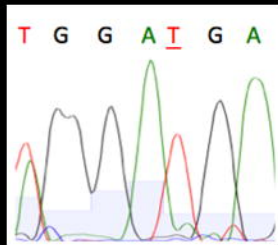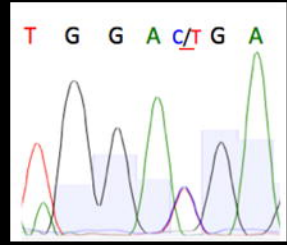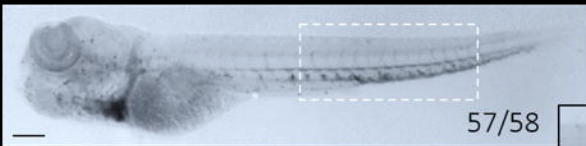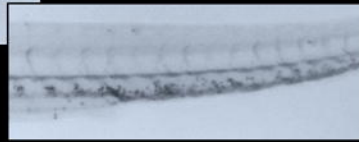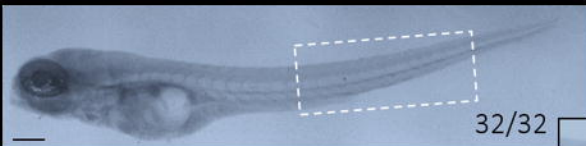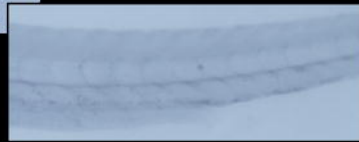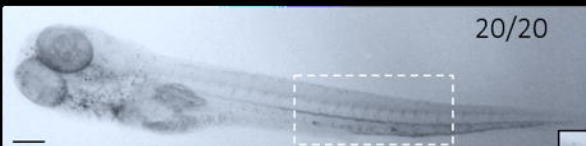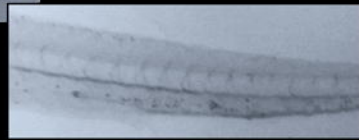

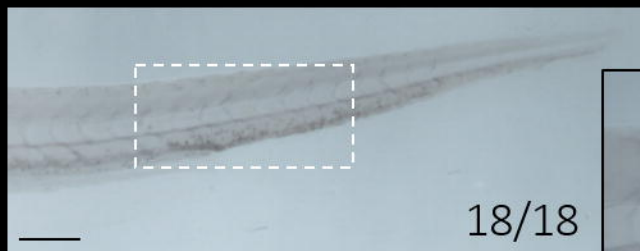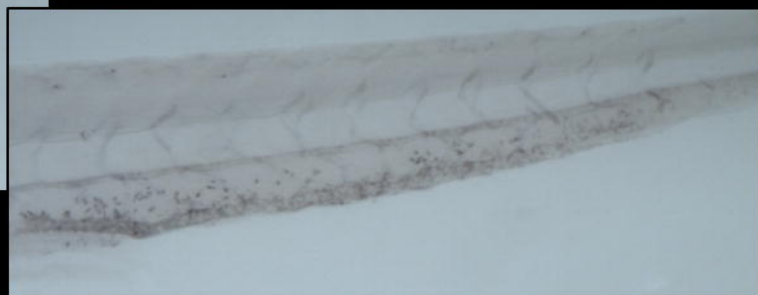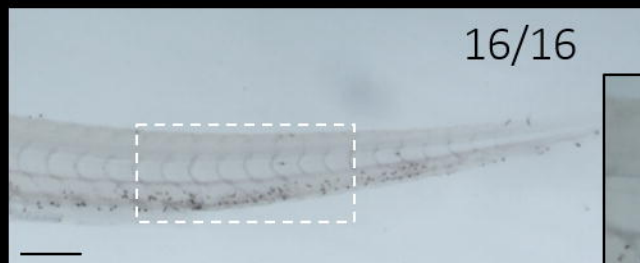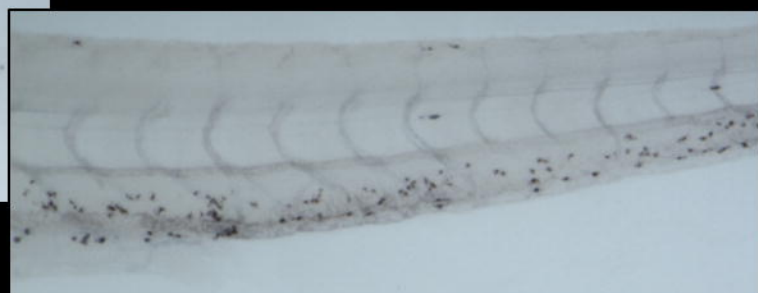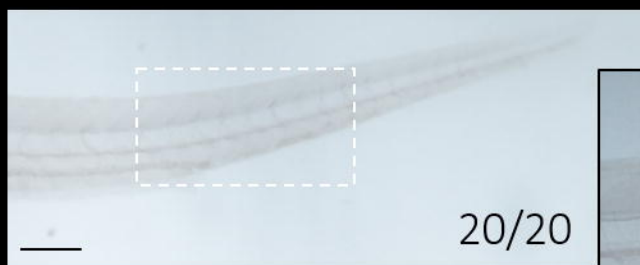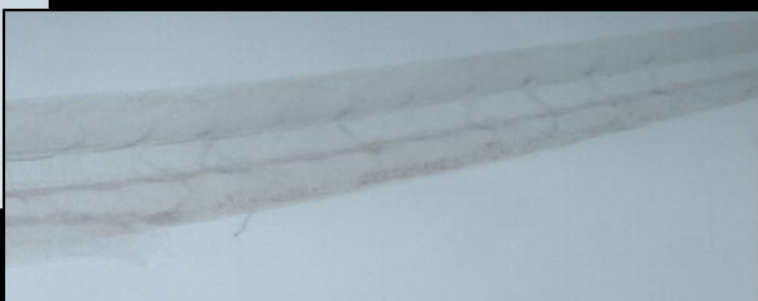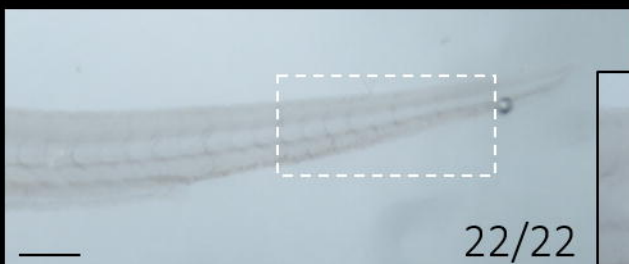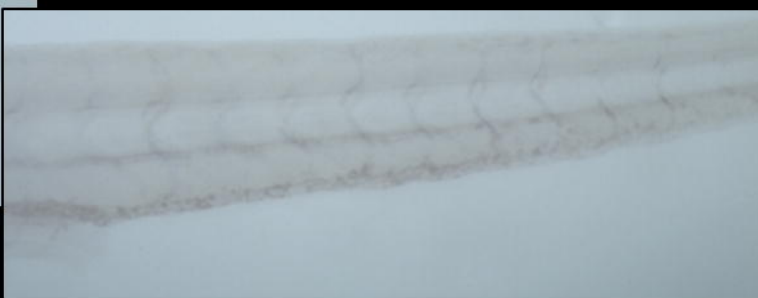

Source: http://biorxiv.org/content/10.1101/456541v1.full.pdf
